# Supplementary material for: Influence of in-plane Stone–Thrower–Wales defects and edge functionalisation on the adsorption of CO2and H2O on graphene
Source: Royal Society of Chemistry journal article supplement (doi:10.1039/c4ra06184e), 2014-08-13
Supplement: c4ra06184e1.pdf [file c4ra06184e1.pdf]

## SUPPORTING INFORMATION FIGURES

### BARE SHEET

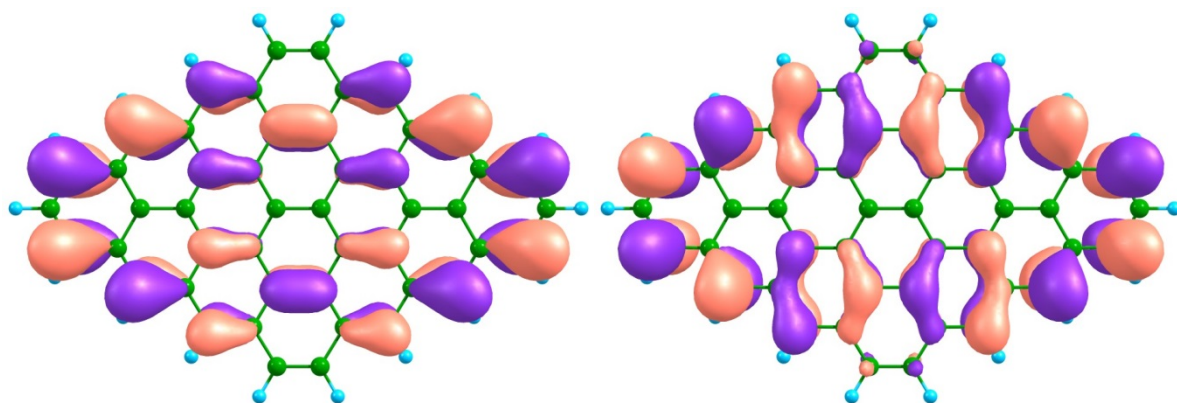

### HOMO AND LUMO OF P-Gr/H

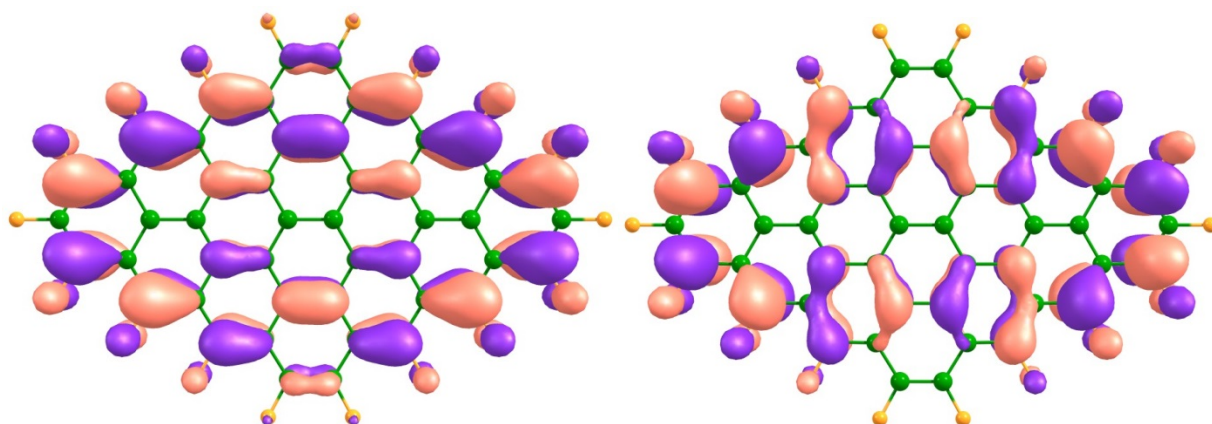

### HOMO AND LUMO OF P-Gr/F

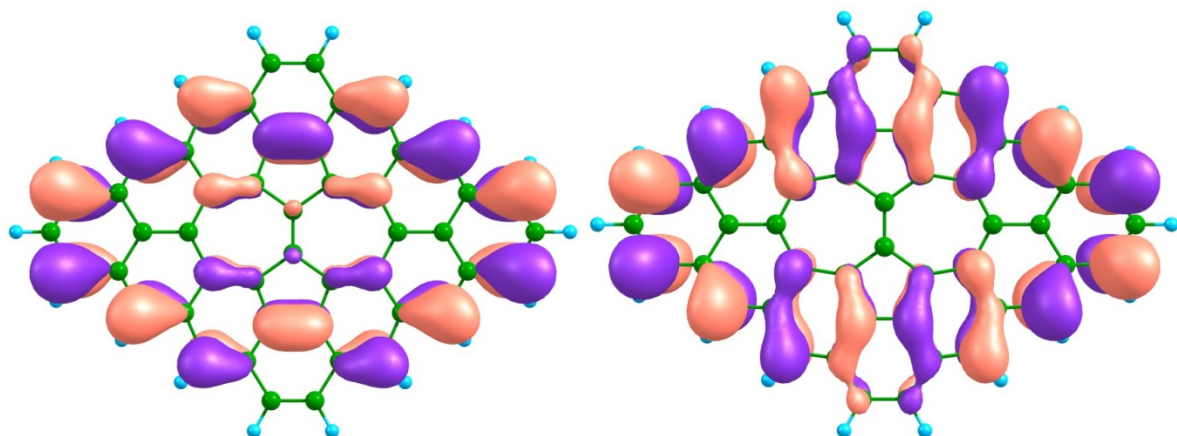

### HOMO AND LUMO OF SW-Gr/H

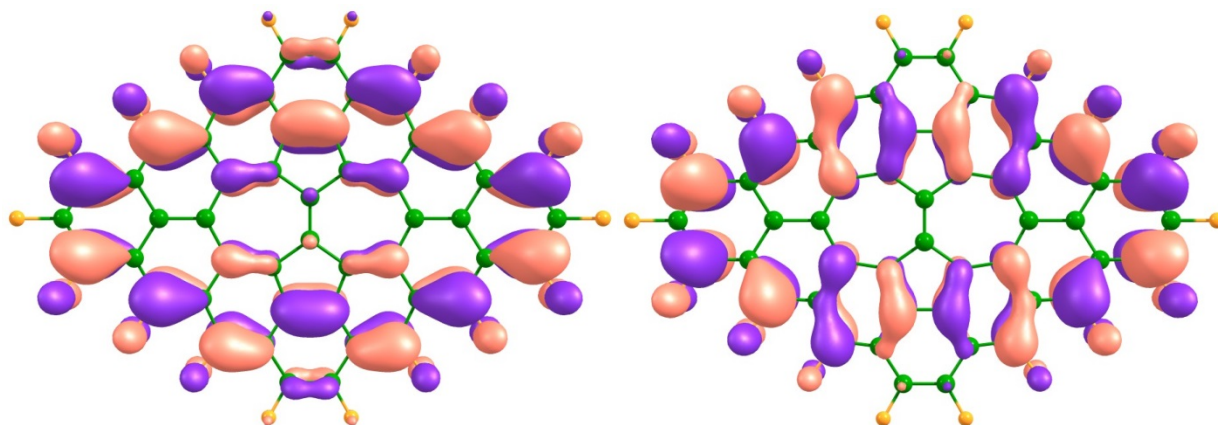

### HOMO AND LUMO OF SW-Gr/F

Figure S1. Frontier Molecular Orbital distribution of Bare sheets.

### ADSORPTION OF CO<sub>2</sub>

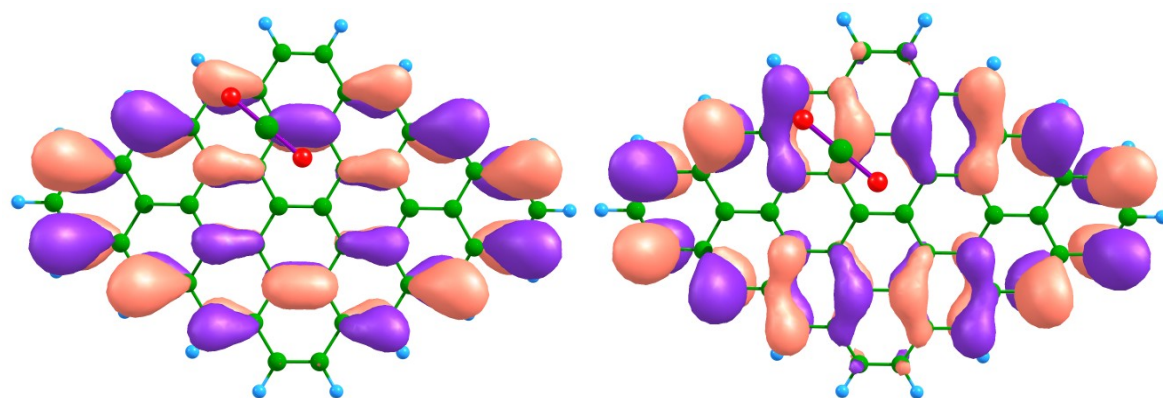

### HOMO AND LUMO OF P-Gr/H with CO<sub>2</sub>

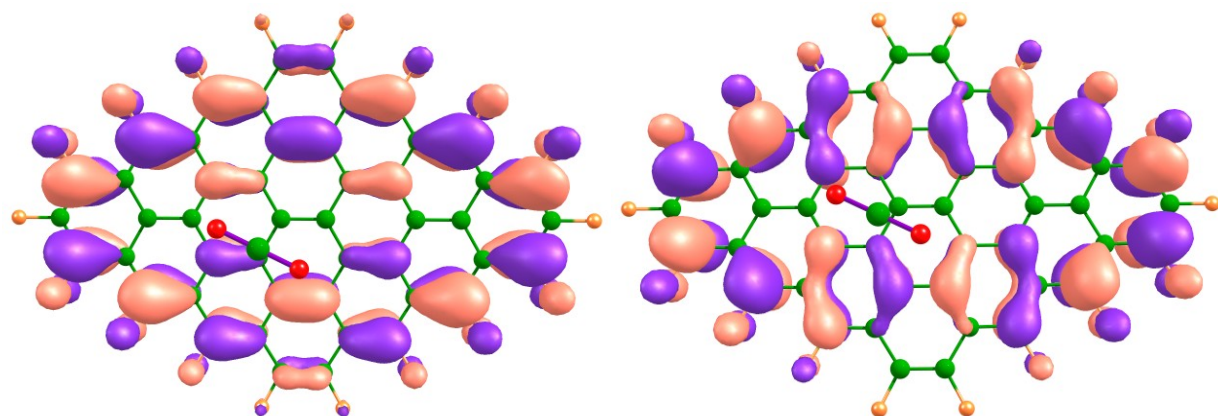

**HOMO AND LUMO OF P-Gr/F with CO<sub>2</sub>**

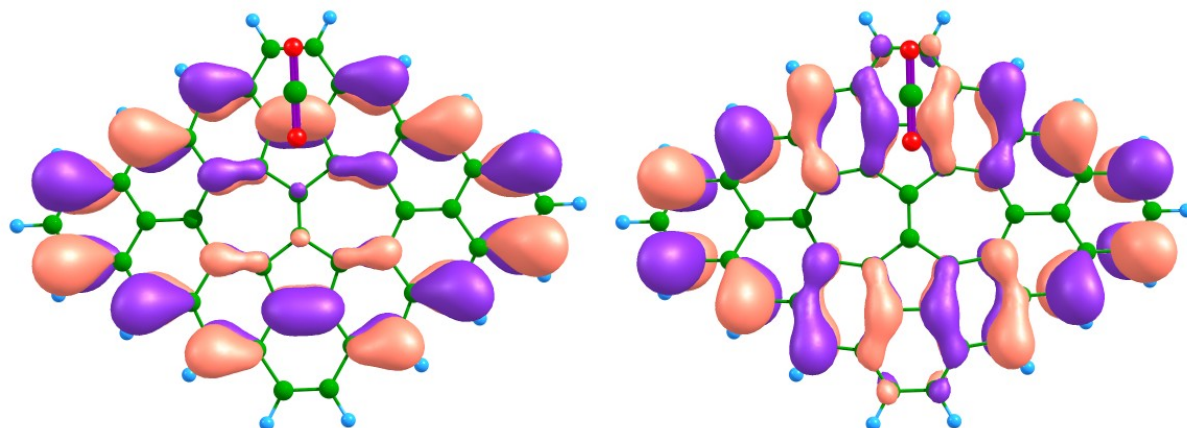

**HOMO AND LUMO OF SW-Gr/H with CO<sub>2</sub>**

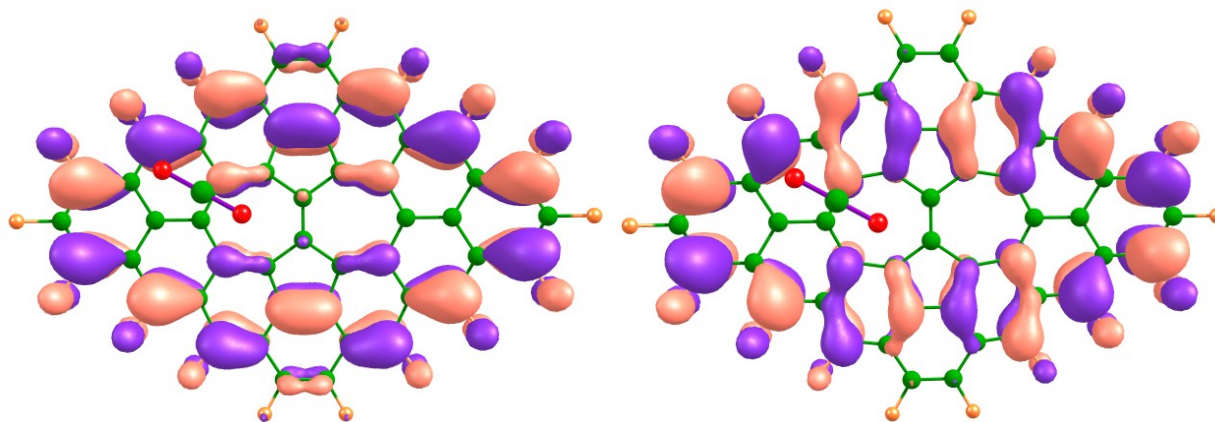

**HOMO AND LUMO OF SW-Gr/F with CO<sub>2</sub>**

**Figure S2. Frontier Molecular Orbital distribution of the most stable configurations of CO<sub>2</sub> adsorbed sheets.**



## ADSORPTION OF H<sub>2</sub>O

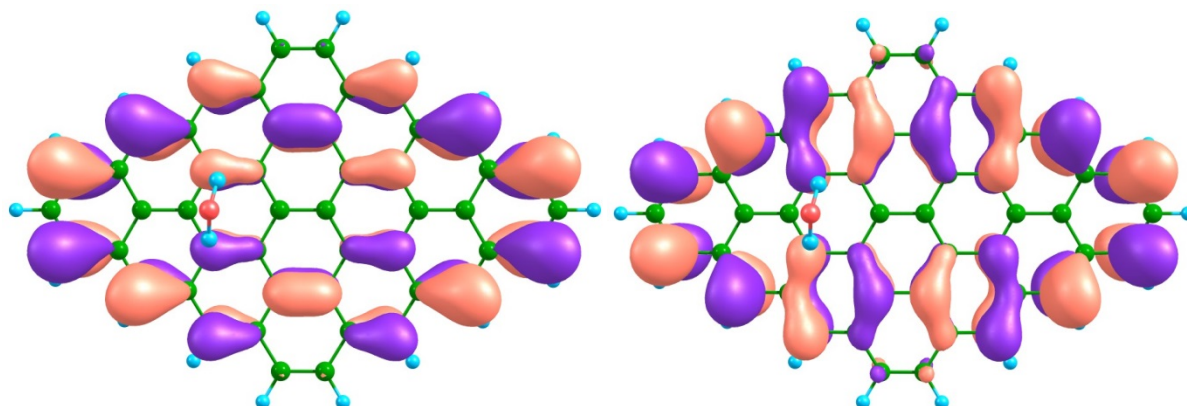

HOMO AND LUMO OF P-Gr/H with H<sub>2</sub>O

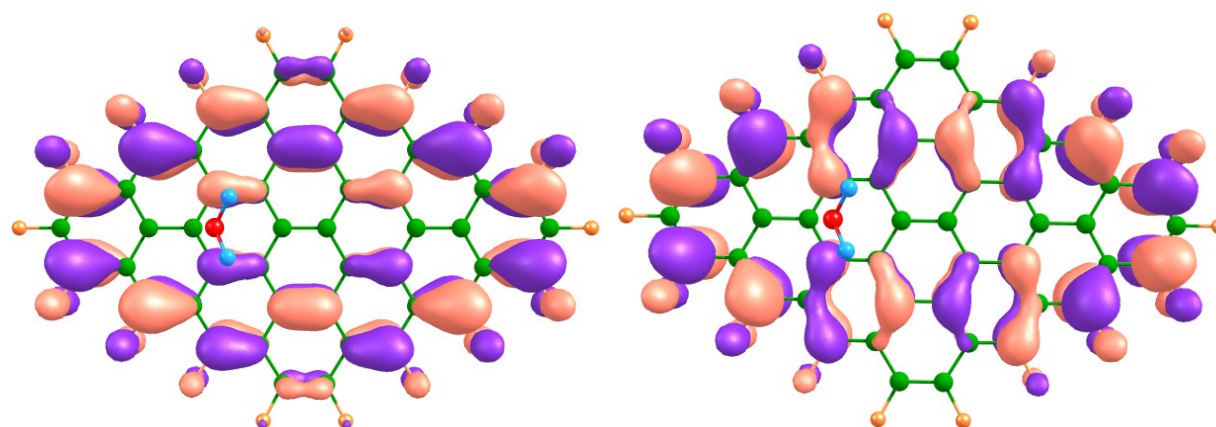

HOMO AND LUMO OF P-Gr/F with H<sub>2</sub>O

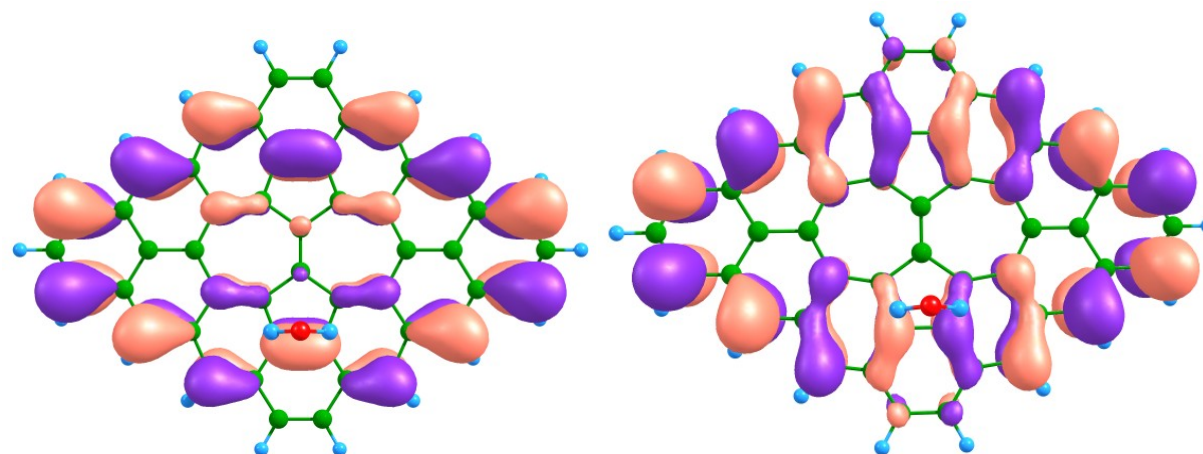

HOMO AND LUMO OF SW-Gr/H with H<sub>2</sub>O

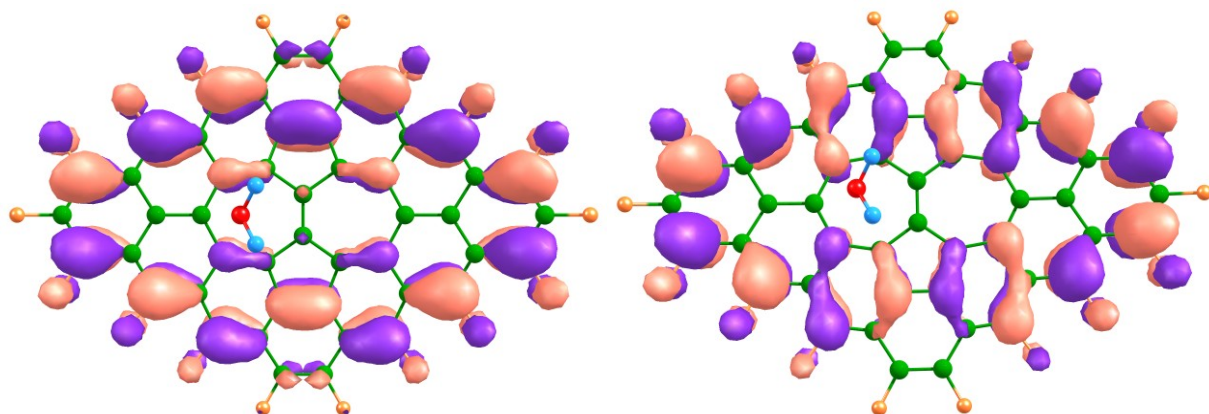

### HOMO AND LUMO OF SW-Gr/F with H<sub>2</sub>O

**Figure S3. Frontier Molecular Orbital distribution of the most stable configurations of H<sub>2</sub>O adsorbed sheets.**
